# Supplementary material for: Niraparib restrains prostate cancer cell proliferation and metastasis and tumor growth in mice by regulating the lncRNA MEG3/miR-181-5p/GATA6 pathway
Source: PeerJ journal article supplement (doi:10.7717/peerj.16314), 2023-11-29
Supplement: MIQE_checklist.pdf [file MIQE_checklist.pdf]

Table 1. MIQE checklist for authors, reviewers, and editors.<sup>a</sup>

| Item to check                                                                     | Section        | Item to check                                                            | Section        |
|-----------------------------------------------------------------------------------|----------------|--------------------------------------------------------------------------|----------------|
| Experimental design                                                               |                | qPCR oligonucleotides                                                    |                |
| Definition of experimental and control groups                                     | Section 3      | Primer sequences                                                         | Section 2.4    |
| Number within each group                                                          | Figure legends | RTPrimerDB identification number                                         | Not applicable |
| Assay carried out by the core or investigator's laboratory?                       | investigator   | Probe sequences                                                          | Not applicable |
| Acknowledgment of authors' contributions                                          | Statement      | Location and identity of any modifications                               | Not applicable |
| Sample                                                                            |                | Manufacturer of oligonucleotides                                         | Not applicable |
| Description                                                                       | Section 2.4    | Purification method                                                      | Not applicable |
| Volume/mass of sample processed                                                   | Section 2.4    | qPCR protocol                                                            |                |
| Microdissection or macrodissection                                                | Not applicable | Complete reaction conditions                                             | Section 2.4    |
| Processing procedure                                                              | Section 2.4    | Reaction volume and amount of cDNA/DNA                                   | Section 2.4    |
| If frozen, how and how quickly?                                                   | Section 2.4    | Primer, (probe), Mg <sup>2+</sup> , and dNTP concentrations              | Section 2.4    |
| If fixed, with what and how quickly?                                              | Not applicable | Polymerase identity and concentration                                    | Section 2.4    |
| Sample storage conditions and duration (especially for FFPE <sup>b</sup> samples) |                | Buffer/kit identity and manufacturer                                     | Section 2.4    |
| Nucleic acid extraction                                                           |                | Exact chemical composition of the buffer                                 | Not applicable |
| Procedure and/or instrumentation                                                  | Section 2.4    | Additives (SYBR Green I, DMSO, and so forth)                             | Section 2.4    |
| Name of kit and details of any modifications                                      | Section 2.4    | Manufacturer of plates/tubes and catalog number                          | Not applicable |
| Source of additional reagents used                                                | Not applicable | Complete thermocycling parameters                                        | Section 2.4    |
| Details of DNase or RNase treatment                                               | Section 2.4    | Reaction setup (manual/robotic)                                          | Not applicable |
| Contamination assessment (DNA or RNA)                                             | Section 2.4    | Manufacturer of qPCR instrument                                          | Section 2.4    |
| Nucleic acid quantification                                                       | Section 2.4    | qPCR validation                                                          |                |
| Instrument and method                                                             | Section 2.4    | Evidence of optimization (from gradients)                                | Not applicable |
| Purity (A <sub>260</sub> /A <sub>280</sub> )                                      | Not applicable | Specificity (gel, sequence, melt, or digest)                             | Section 2.4    |
| Yield                                                                             | Not applicable | For SYBR Green I, C <sub>q</sub> of the NTC                              | Not applicable |
| RNA integrity: method/instrument                                                  | Section 2.4    | Calibration curves with slope and y intercept                            | Section 2.4    |
| RIN/RQI or C <sub>q</sub> of 3' and 5' transcripts                                | Section 2.4    | PCR efficiency calculated from slope                                     | Not applicable |
| Electrophoresis traces                                                            | Not applicable | Clis for PCR efficiency or SE                                            | Not applicable |
| Inhibition testing (C <sub>q</sub> dilutions, spike, or other)                    | Section 2.4    | r <sup>2</sup> of calibration curve                                      | Not applicable |
| Reverse transcription                                                             |                | Linear dynamic range                                                     | Not applicable |
| Complete reaction conditions                                                      | Section 2.4    | C <sub>q</sub> variation at LOD                                          | Not applicable |
| Amount of RNA and reaction volume                                                 | Section 2.4    | Clis throughout range                                                    | Not applicable |
| Priming oligonucleotide (if using GSP) and concentration                          | Section 2.4    | Evidence for LOD                                                         | Not applicable |
| Reverse transcriptase and concentration                                           | Section 2.4    | If multiplex, efficiency and LOD of each assay                           | Not applicable |
| Temperature and time                                                              | Section 2.4    | Data analysis                                                            |                |
| Manufacturer of reagents and catalogue numbers                                    | Not applicable | qPCR analysis program (source, version)                                  | Section 2.4    |
| C <sub>q</sub> s with and without reverse transcription                           | Not applicable | Method of C <sub>q</sub> determination                                   | Not applicable |
| Storage conditions of cDNA                                                        | Not applicable | Outlier identification and disposition                                   | Not applicable |
| qPCR target information                                                           |                | Results for NTCs                                                         | Not applicable |
| Gene symbol                                                                       | Not applicable | Justification of number and choice of reference genes                    | Section 2.4    |
| Sequence accession number                                                         | Not applicable | Description of normalization method                                      | Section 2.4    |
| Location of amplicon                                                              | Not applicable | Number and concordance of biological replicates                          | Not applicable |
| Amplicon length                                                                   | Not applicable | Number and stage (reverse transcription or qPCR) of technical replicates | Section 2.4    |
| In silico specificity screen (BLAST, and so on)                                   | Not applicable | Repeatability (intraassay variation)                                     | Section 2.12   |
| Pseudogenes, retropseudogenes, or other homologs?                                 | Not applicable | Reproducibility (interassay variation, CV)                               | Not applicable |
| Sequence alignment                                                                | Not applicable | Power analysis                                                           | Not applicable |
| Secondary structure analysis of amplicon                                          | Not applicable | Statistical methods for results significance                             | Section 2.12   |
| Location of each primer by exon or intron (if applicable)                         | Not applicable | Software (source, version)                                               | Section 2.12   |
| What splice variants are targeted?                                                | Not applicable | C <sub>q</sub> or raw data submission with RDML                          | Not applicable |

<sup>a</sup> All essential information (E) must be submitted with the manuscript. Desirable information (D) should be submitted if available. If primers are from RTPrimerDB, information on qPCR target, oligonucleotides, protocols, and validation is available from that source.

<sup>b</sup> FFPE, formalin-fixed, paraffin-embedded; RIN, RNA integrity number; RQI, RNA quality indicator; GSP, gene-specific priming; dNTP, deoxynucleoside triphosphate.

<sup>c</sup> Assessing the absence of DNA with a no-reverse transcription assay is essential when first extracting RNA. Once the sample has been validated as DNA free, inclusion of a no-reverse transcription control is desirable but no longer essential.

<sup>d</sup> Disclosure of the probe sequence is highly desirable and strongly encouraged; however, because not all vendors of commercial predesigned assays provide this information, it cannot be an essential requirement. Use of such assays is discouraged.
