# Supplementary material for: Niraparib restrains prostate cancer cell proliferation and metastasis and tumor growth in mice by regulating the lncRNA MEG3/miR-181-5p/GATA6 pathway
Source: PeerJ. 2023 Nov 29;11:e16314. doi: 10.7717/peerj.16314 (PMC10693232; doi:10.7717/peerj.16314)
Supplement: Supplemental Information 1 [file peerj-11-16314-s001.xlsx]

## Sheet: Sheet1
1A
Adjancent	1	1.16	1.05	1.28	0.91	1.1	0.74	1.47	0.84	1.08	1.18	0.95	0.87	1.02	0.85	0.77	1.05	1.33	0.9	0.81
Tumor	0.33	0.41	0.38	0.53	0.21	0.3	0.29	0.59	0.37	0.44	0.39	0.41	0.4	0.53	0.45	0.25	0.66	0.47	0.5	0.28
1C
Adjancent	1	1.05	0.79	0.84	1.15	0.91	1.29	0.76	1.01	1.41	0.96	1.22	0.72	1.08	1.34	1.11	0.67	1.47	0.84	0.9
Tumor	2.24	2.01	2.29	1.95	2.47	2.11	2.33	2.01	2.39	2	2.07	2.16	2.4	1.84	1.91	2.44	1.73	2.05	1.98	2.18
1D
Adjancent	1	1.14	0.82	1.23	1.16	1.03	0.8	0.99	1.33	0.76	1.19	0.87	0.92	1.07	0.89	1	1.09	0.95	1.01	0.9
Tumor	0.36	0.47	0.41	0.64	0.3	0.35	0.22	0.44	0.27	0.51	0.47	0.28	0.34	0.49	0.59	0.45	0.54	0.3	0.39	0.38
1E
MEG3	0.33	0.41	0.38	0.53	0.21	0.3	0.29	0.59	0.37	0.44	0.39	0.41	0.4	0.53	0.45	0.25	0.66	0.47	0.5	0.28
miR-181-5p mimic	2.24	2.01	2.29	1.95	2.47	2.11	2.33	2.01	2.39	2	2.07	2.16	2.4	1.84	1.91	2.44	1.73	2.05	1.98	2.18
1F
miR-181-5p mimic	2.24	2.01	2.29	1.95	2.47	2.11	2.33	2.01	2.39	2	2.07	2.16	2.4	1.84	1.91	2.44	1.73	2.05	1.98	2.18
GATA6	0.36	0.47	0.41	0.64	0.3	0.35	0.22	0.44	0.27	0.51	0.47	0.28	0.34	0.49	0.59	0.45	0.54	0.3	0.39	0.38
2A
	0 μM							1 μM							2 μM							4 μM							8 μM
0 h	0.18	0.19	0.21	0.21	0.2	0.2		0.19	0.24	0.22	0.24	0.21	0.22		0.21	0.22	0.24	0.15	0.21	0.17		0.2	0.19	0.17	0.23	0.25	0.2		0.21	0.2	0.23	0.19	0.22	0.2
24 h	0.48	0.55	0.49	0.46	0.48	0.36		0.43	0.42	0.4	0.35	0.51	0.38		0.33	0.43	0.45	0.34	0.42	0.34		0.3	0.32	0.28	0.26	0.3	0.34		0.27	0.29	0.2	0.33	0.26	0.3
48 h	0.95	0.85	0.73	0.81	0.94	0.79		0.64	0.73	0.72	0.86	0.72	0.74		0.47	0.54	0.58	0.63	0.67	0.62		0.38	0.5	0.45	0.45	0.43	0.49		0.38	0.44	0.3	0.37	0.44	0.33
72 h	1.4	1.16	1.25	1.47	1.43	1.3		1.08	1.06	1.2	1.16	1	1.12		0.86	0.94	0.73	0.81	0.99	0.86		0.65	0.74	0.73	0.67	7	0.72		0.64	0.58	0.6	0.77	0.69	0.74
2B
	0 min							30 min							60 min							120 min							240 min
0 h	0.2	0.19	0.21	0.23	0.2	0.22		0.19	0.21	0.22	0.2	0.21	0.22		0.21	0.2	0.24	0.18	0.21	0.17		0.2	0.23	0.17	0.21	0.25	0.2		0.21	0.18	0.23	0.19	0.22	0.23
24 h	0.46	0.38	0.47	0.45	0.57	0.47		0.41	0.36	0.4	0.38	0.51	0.45		0.35	0.28	0.4	0.38	0.32	0.39		0.25	0.3	0.29	0.36	0.35	0.31		0.26	0.29	0.3	0.27	0.23	0.3
48 h	0.81	0.85	0.83	0.75	1.03	0.85		0.66	0.74	0.75	0.87	0.71	0.69		0.59	0.5	0.56	0.68	0.53	0.47		0.38	0.42	0.43	0.5	0.49	0.38		0.38	0.36	0.43	0.4	0.43	0.31
72 h	1.34	1.51	1.38	1.22	1.41	1.21		1.06	1.19	1.17	0.86	1.04	1.02		0.84	0.95	1.02	0.84	0.78	0.88		0.64	0.67	0.73	0.85	0.74	0.78		0.63	0.61	0.7	0.69	0.72	0.76
2C
	0 μM							1 μM							2 μM							4 μM							8 μM
	0.99	1.05	0.93	0.99	1.09	1.04		1.91	1.76	1.82	1.86	1.83	1.95		2.57	2.52	2.72	2.36	2.76	2.58		3.53	3.36	3.19	3.47	3.73	3.33		2.56	2.29	2.42	2.57	2.59	2.49
2D
	0 min							30 min							60 min							120 min							240 min
	1.05	0.94	1.11	0.95	0.96	1.04		1.69	1.52	1.73	1.7	1.63	1.73		2.44	2.32	2.27	2.62	257	2.34		3.41	3.56	3.3	3.75	3.61	3.22		3.15	3.32	3.46	3.3	3.59	3.25
2E
	0 μM							1 μM							2 μM							4 μM							8 μM
	1.05	0.97	1.05	1.03	0.93	1.01		0.75	0.66	0.74	0.65	0.8	0.76		0.36	0.51	0.46	0.41	0.38	0.42		0.26	0.27	0.24	0.21	0.32	0.24		0.4	0.48	0.42	0.51	0.49	0.42
2F
	0 min							30 min							60 min							120 min							240 min
	1.05	0.94	1.11	0.95	0.96	1.04		0.65	0.63	0.76	0.61	0.64	0.76		0.41	0.49	0.49	0.42	0.56	0.41		0.27	0.29	0.19	0.3	0.27	0.2		0.42	0.38	0.43	0.52	0.46	0.45
2G
	0 μM							1 μM							2 μM							4 μM							8 μM
	0.99	1.05	0.93	0.99	1.09	1.04		1.74	1.79	1.6	1.76	1.73	1.85		2.18	1.88	2.15	2.03	2.17	2.03		2.67	2.8	2.57	2.66	2.92	2.79		2.17	2.13	2.1	2.11	2.32	1.97
2H
	0 min							30 min							60 min							120 min							240 min
	1.05	0.94	1.11	0.95	0.96	1.04		1.77	1.79	1.72	1.83	1.77	1.64		2.33	222	2.19	2.28	2.06	2.08		2.65	2.94	2.68	2.78	2.94	2.66		2.18	2.21	2.12	1.88	2.08	2.04
3B
	PBS							Niraparib
	181	151	167	173	205	163		68	52	70	58	53	62
3D
	PBS							Niraparib
	39.9	34.3	36.1	36.5	42.4	35.5		15.4	17.5	16.4	17.2	13.2	13.5
3F
	PBS							Niraparib
E-cadherin	1	0.99	1.06	0.91	0.97	1.09		0.34	0.33	0.37	0.46	0.32	0.42									18.5	21.9	22.8	23.4	24.5	20.5
ICAM-1	1	1.09	0.97	0.93	1.05	0.96		2.35	2.56	2.6	0.33	2.38	2.5
CD44	1	1.06	0.93	1.09	0.95	0.98		2.16	2.04	2.17	1.99	2.11	2.22
4B
	NC mimic							miR-181-5p mimic
MEG3-WT	1.05	0.97	0.92	1.07	1.01	0.94		0.35	0.27	0.18	0.23	0.24	0.33
MEG3-MUT	1	0.97	0.96	0.94	1.05	1.08		0.98	0.86	0.91	0.92	0.99	1.02
4C
	NC mimic							miR-181-5p mimic
MEG3-WT	0.99	1.03	1.02	0.97	1.03	0.9		0.38	0.34	0.25	0.29	0.38	0.4
MEG3-MUT	1.04	0.97	1.02	1.07	0.96	0.92		0.95	0.85	0.93	1.04	1	0.96
4D
	vector							pcDNA-MEG3							sh-NC							sh-MEG3
	0.96	1.04	1.09	0.93	0.95	1.05		3.22	2.98	3.18	3.24	2.84	2.89		0.97	1.01	1.13	1.05	0.96	1.07		0.2	0.29	0.23	0.28	0.21	0.31
4E
		vector							pcDNA-MEG3							sh-NC							sh-MEG3
	0.91	0.95	1.07	1.09	0.96	1.02		0.26	0.33	0.25	0.32	0.42	0.26		1.08	0.93	1.05	1.12	1.01	1.09		2.9	2.72	2.84	.2.93	3.13	3.08
4F
	NC mimic							miR-181-5p mimic							NC inhibitor							miR-181-5p inhibitor
	1.04	0.94	0.9	1.05	1.08	0.94		2.95	2.65	3	2.96	2.74	2.78		1.07	1.09	1.06	1.06	0.97	0.89		0.25	0.37	0.31	0.37	0.33	0.37
4G
	NC mimic							miR-181-5p mimic							NC inhibitor							miR-181-5p inhibitor
	1	1.03	1	0.9	0.96	1.05		0.39	0.4	0.24	0.4	0.37	0.32		1.1	0.96	0.93	0.88	0.97	1.07		2.74	2.51	2.33	2.59	2.66	2.56
4I
	NC mimic							miR-181-5p mimic							NC inhibitor							miR-181-5p inhibitor
	1.03	1.03	0.95	0.93	1.07	1.01		0.42	0.47	0.35	0.46	0.39	0.37		1.1	1.03	1.09	1.05	1.04	0.9		2.27	2.12	2.22	2.4	2.08	2.27
5A
	vector							pcDNA-MEG3							pcDNA-MEG3+NC mimic							pcDNA-MEG3+miR-181-5p mimic
	1.05	0.99	0.9	1.06	1.06	1.05		0.34	0.44	0.32	0.27	0.27	0.36		0.36	0.29	0.37	0.33	0.29	0.25		0.97	0.96	0.98	0.79	1	0.98
5B
	vector							pcDNA-MEG3							pcDNA-MEG3+NC mimic							pcDNA-MEG3+miR-181-5p mimic
0 h	0.2	0.22	0.23	0.2	0.18	0.19		0.21	0.2	0.23	0.18	0.24	0.24		0.24	0.22	0.2	0.2	0.23	0.19		0.19	0.2	0.19	0.18	0.21	0.24
24 h	0.53	0.57	0.57	0.47	0.43	0.51		0.3	0.26	0.3	0.4	0.38	0.36		0.32	0.25	0.27	0.34	0.33	0.3		0.45	0.37	0.56	0.5	0.45	0.46
48 h	0.77	0.94	0.97	0.88	0.79	0.95		0.5	0.45	0.5	0.33	0.41	0.49		0.43	0.56	0.49	0.59	0.5	0.4		0.82	0.86	0.69	0.85	0.71	0.91
72 h	1.47	1.26	1.38	1.34	1.18	1.5		0.78	0.62	0.8	0.63	0.77	0.64		0.73	0.75	0.7	0.87	0.63	0.81		1.31	1.2	1.27	1.17	1.21	1.48
5C
	vector							pcDNA-MEG3							pcDNA-MEG3+NC mimic							pcDNA-MEG3+miR-181-5p mimic
	179	168	180	183	149	152		65	57	81	70	62	57		66	59	77	64	66	48		147	139	175	150	166	150
5F
	vector							pcDNA-MEG3							pcDNA-MEG3+NC mimic							pcDNA-MEG3+miR-181-5p mimic
	37.1	39.8	42.5	33.8	41.1	36.4		15.6	16.3	19.2	16.3	13.9	16.3		15.5	19	16.2	15.8	17.5	15.1		31.5	37.6	31.8	32.1	34.7	37.2
5H
	vector							pcDNA-MEG3							pcDNA-MEG3+NC mimic							pcDNA-MEG3+miR-181-5p mimic
E-cadherin	1.06	0.96	1.01	0.93	1.09	0.95		0.4	0.43	0.32	0.39	0.43	0.47		0.36	0.29	0.37	0.33	0.29	0.25		0.96	0.99	0.98	0.8	0.93	0.9
ICAM-1	1.03	0.95	1.05	1.07	0.98	0.92		2.21	2.36	2.1	2.42	2.19	2.22		2.32	2.28	2.21	2.22	2.5	2.48		1.18	1.24	1.15	1.39	124	1.26
CD44	0.98	1.01	0.95	0.92	1.09	1.05		2.12	2.1	2.01	2.05	2	2		2.13	1.94	2.04	2.05	2.12	1.8		1.12	1.05	1.12	1.15	1.2	1.24
6A
	NC inhibitor							miR-181-5p inhibitor							miR-181-5p inhibitor+sh-NC							miR-181-5p inhibitor+sh-GATA6
	1.07	0.94	0.99	1.07	0.98	0.95		2.35	2.32	2.11	2.15	22.34	2.33		2.15	2.32	2.24	2.15	2.46	2.15		1.24	1.2	1.09	1.29	1.25	1.22
6B
	NC inhibitor							miR-181-5p inhibitor							miR-181-5p inhibitor+sh-NC							miR-181-5p inhibitor+sh-GATA6
0 h	0.2	0.22	0.23	0.2	0.18	0.19		0.21	0.2	0.23	0.18	0.24	0.24		0.2	0.24	0.22	0.21	0.23	0.22		0.2	0.21	0.24	0.25	0.21	0.21
24 h	0.55	0.47	0.59	0.6	0.52	0.43		0.25	0.31	0.29	0.39	0.27	0.26		0.29	0.36	0.4	0.27	0.32	0.31		0.4	0.51	0.51	0.41	0.4	0.5
48 h	0.93	0.8	0.78	0.95	0.74	0.8		0.45	0.46	0.5	0.43	0.46	0.32		0.46	0.41	0.59	0.43	0.4	0.47		0.89	0.78	0.94	0.8	0.79	0.69
72 h	1.29	1.28	1.29	1.21	1.35	1.54		0.59	0.58	0.53	0.74	0.73	0.63		0.79	0.57	0.73	0.62	0.73	0.61		1.16	1.07	1.36	1.24	1.39	1.24
6C
	NC inhibitor							miR-181-5p inhibitor							miR-181-5p inhibitor+sh-NC							miR-181-5p inhibitor+sh-GATA6
	167	173	163	145	150	177		68	51	62	62	49	53		68	60	4	62	63	66		156	154	135	156	141	161
6F
	NC inhibitor							miR-181-5p inhibitor							miR-181-5p inhibitor+sh-NC							miR-181-5p inhibitor+sh-GATA6
	40.6	34.8	42	36.3	35.6	33.1		15.9	12.8	14.4	18.4	14.6	14.8		15.6	15.1	14.3	12.3	17	14.8		32.8	34.9	36.4	39.2	33.2	33.1
6G
	NC inhibitor							miR-181-5p inhibitor							miR-181-5p inhibitor+sh-NC							miR-181-5p inhibitor+sh-GATA6
E-cadherin	0.95	1.08	0.92	0.99	1.04	1.02		0.4	0.43	0.32	0.39	0.43	0.47		0.36	0.29	0.37	0.33	0.29	0.25		0.96	0.99	0.98	0.8	0.93	0.9
ICAM-1	1.05	1.08	1.03	0.88	1	0.93		2.35	2.56	2.4	2.46	2.63	2.33		2.49	2.6	2.34	2.25	2.43	2.49		2.25	2.13	1.1	1.13	1.29	1.26
CD44	1.1	0.92	1.05	1.03	1.06	0.96		2.08	1.97	2.23	2.26	2.04	2.18		2.01	2.18	2.21	2.06	2.22	0.02		1.1	1.02	1.08	1.16	0.99	1.15
7B
	PBS									Niraparib									Niraparib+sh-NC									Niraparib+sh-MEG3
0 d	0	0	0	0	0	0	0	0		0	0	0	0	0	0	0	0		0	0	0	0	0	0	0	0		0	0	0	0	0	0	0	0
7 d	127.3	103.5	115.4	110.5	80.2	92.7	58.1	131		62.1	86.8	47.7	60.4	41.6	64.3	50.3	69.6		56	41.1	60.5	73.9	86.8	85.5	52.5	59.8		84.6	84.8	78.6	63.7	118.6	135.4	84	113.9
14 d	345.2	365.6	292.8	288.3	302.5	283.7	251.2	371.1		132.4	109.2	106.4	179.6	185.2	155.3	183.3	127.3		155.5	106.8	101.4	106.2	116.7	136.8	185.6	102.3		210.3	281.8	240.1	253.1	327.8	282.3	297.1	228
21 d	594.9	454.3	564.3	474.8	430.3	566.4	483	454		263.2	313.4	231.7	240.1	198.7	214.7	263.4	280.7		315.8	260	251.4	322.2	246.3	280	260.7	217.3		544	507.1	511.8	376	417.4	483.4	442.5	431
28 d	779.6	928.8	895.7	748.8	804.4	892	799.1	921.6		474.1	425	515.3	560.2	403.5	448.8	522.9	533.9		485.2	517.8	531.4	586.8	533.7	555.5	385.6	494		750.8	891.1	863	750	719.9	758.8	861.8	744.3
7C
	PBS									Niraparib									Niraparib+sh-NC									Niraparib+sh-MEG3
	0.88	0.96	0.86	0.85	0.96	0.8	0.86	0.75		0.56	0.41	0.47	0.5	0.39	0.56	0.53	0.47		0.46	0.44	0.51	0.61	0.51	0.47	0.48	0.57		0.77	0.75	0.81	0.9	0.81	0.72	0.78	0.91
7D
	PBS									Niraparib									Niraparib+sh-NC									Niraparib+sh-MEG3
	1.05	0.87	1.01	0.97	1.03	0.92	1.09	1.08		2.3	2.45	2.31	2.1	2.12	2.37	2.13	2.18		2.12	2.03	2.29	2.32	2.23	2.14	1.97	2.1		0.77	0.75	0.81	0.9	0.81	0.72	0.78	0.91
	1.04	0.92	1.09	1.04	0.93	1	1.01	0.99		0.46	0.39	0.3	0.28	0.39	0.44	0.38	0.33		0.42	0.33	0.32	0.39	0.43	0.36	0.39	0.45
7F
	PBS									Niraparib									Niraparib+sh-NC									Niraparib+sh-MEG3
	0.92	1.08	1.09	0.94	0.96	1	0.97	0.95		2	2.09	1.91	2.1	2.03	1.97	2.21	1.89		2.05	2.09	1.8	2.27	2.24	1.96	2.05	1.99		1.32	1.29	1.24	1.39	1.17	1.28	1.34	1.18
7H
	PBS									Niraparib									Niraparib+sh-NC									Niraparib+sh-MEG3
	95.5	98.1	96.1	112.1	93.9	96.9	106.9	104.2		41.1	50.1	35.8	41.3	46.1	46.6	36.2	48		51.8	38.1	42.8	48.5	48.9	47	41.3	45.9		82	97.7	86	86.2	88.2	73.8	89.2	86.2
